# Supplementary material
Source: Springer Nature journal article supplement (https://www.springermedizin.de/resource/supplementary/12885_2013_4343_MOESM1_ESM.pdf/9466060)
Supplement: MOESM1 [file 9466060]

Centre-ID

Patient-ID

## Record of Clinical Tumour Data

### 1. Diagnosis: ICD-10-Coding

| C18<br>Malignant neoplasm of colon | C19<br>Malignant neoplasm of<br>rectosigmoid junction | C20<br>Malignant neoplasm of rectum |
|------------------------------------|-------------------------------------------------------|-------------------------------------|
| <input type="checkbox"/>           | <input type="checkbox"/>                              | <input type="checkbox"/>            |

### 2a. Date of initial diagnosis (= date of removal of tissue for investigative purposes)

| day                  |                      | month                |                      | year                 |                      |                      |                      |
|----------------------|----------------------|----------------------|----------------------|----------------------|----------------------|----------------------|----------------------|
| <input type="text"/> | <input type="text"/> | <input type="text"/> | <input type="text"/> | <input type="text"/> | <input type="text"/> | <input type="text"/> | <input type="text"/> |

### 2b. Reason for the diagnosis (please check one box only)

| clarification of symptoms | early cancer recognition | long-term care CED /polyposis | follow-up                | other / unknown          |
|---------------------------|--------------------------|-------------------------------|--------------------------|--------------------------|
| <input type="checkbox"/>  | <input type="checkbox"/> | <input type="checkbox"/>      | <input type="checkbox"/> | <input type="checkbox"/> |

### 2c. If for clarification of symptoms (please check all relevant symptoms)

| occult blood             | haemorrhage              | IBS irritable bowel syndrome | diarrhoea                | obstipation              | anaemia                  | weight loss              | ileus                    |
|--------------------------|--------------------------|------------------------------|--------------------------|--------------------------|--------------------------|--------------------------|--------------------------|
| <input type="checkbox"/> | <input type="checkbox"/> | <input type="checkbox"/>     | <input type="checkbox"/> | <input type="checkbox"/> | <input type="checkbox"/> | <input type="checkbox"/> | <input type="checkbox"/> |

other: .....

**3. Referred by** ,GP' (local doctor)  specialist  no medical referral

### 4. Subsequent treatment by (please indicate hospital or institution)

.....

not known

### 5a. Histomorphological typing

| adenocarcinoma           | mucinous adenocarcinoma  | signet-ring-cell carcinoma | carcinoid                | other<br>(please indicate histological type) |
|--------------------------|--------------------------|----------------------------|--------------------------|----------------------------------------------|
| <input type="checkbox"/> | <input type="checkbox"/> | <input type="checkbox"/>   | <input type="checkbox"/> |                                              |

### 5b. Histomorphological grading

|                           |                          |                                 |                          |                             |                          |                        |                          |
|---------------------------|--------------------------|---------------------------------|--------------------------|-----------------------------|--------------------------|------------------------|--------------------------|
| G1<br>well differentiated | <input type="checkbox"/> | G2<br>moderately differentiated | <input type="checkbox"/> | G3<br>poorly differentiated | <input type="checkbox"/> | G4<br>undifferentiated | <input type="checkbox"/> |
|---------------------------|--------------------------|---------------------------------|--------------------------|-----------------------------|--------------------------|------------------------|--------------------------|

### 6a. Imaging procedures for disease stage ascertainment (tumour spread in the initial diagnosis) *(Please check appropriate box and indicate region of body examination date)*

|             | <input type="checkbox"/><br>sonography | <input type="checkbox"/><br>CT | <input type="checkbox"/><br>MRT | <input type="checkbox"/><br>x-ray | <input type="checkbox"/><br>scintigraphy | other<br>_____ |
|-------------|----------------------------------------|--------------------------------|---------------------------------|-----------------------------------|------------------------------------------|----------------|
| body region |                                        |                                |                                 |                                   |                                          |                |
| date        |                                        |                                |                                 |                                   |                                          |                |

### 6b. TNM classification at initial diagnosis *(see list to be completed)*

c  p  T 
     
 c  p  N 
     
 c  p  M

### 6c. UICC stage at initial diagnosis

### 7. Risk factors for CRC

| Risk factors                                            | yes                      | no                       | unknown                  |
|---------------------------------------------------------|--------------------------|--------------------------|--------------------------|
| smoking                                                 | <input type="checkbox"/> | <input type="checkbox"/> | <input type="checkbox"/> |
| alcohol consumption                                     | <input type="checkbox"/> | <input type="checkbox"/> | <input type="checkbox"/> |
| colorectal polyps                                       | <input type="checkbox"/> | <input type="checkbox"/> | <input type="checkbox"/> |
| inflammatory bowel disease (IBD)                        | <input type="checkbox"/> | <input type="checkbox"/> | <input type="checkbox"/> |
| HNPCC / FAP                                             | <input type="checkbox"/> | <input type="checkbox"/> | <input type="checkbox"/> |
| positive family anamnesis (colorectal cancer in family) | <input type="checkbox"/> | <input type="checkbox"/> | <input type="checkbox"/> |

**Thank you**
